# Supplementary material for: Safety, pharmacokinetics, and pharmacodynamics of milvexian in healthy Japanese participants
Source: PubMed Central journal article supplement (PMC8956633; doi:10.1038/s41598-022-08768-y), 2022-03-25
Supplement: 41598_2022_8768_MOESM1_ESM.pdf [file 41598_2022_8768_MOESM1_ESM.pdf]

## Supplementary Information

### Safety, pharmacokinetics, and pharmacodynamics of milvexian in healthy Japanese participants

Vidya Perera, Zhaoqing Wang, Susan Lubin, Takayo Ueno, Tomomi Shiozaki, Wei Chen, Xiaohui (Sophia) Xu, Dietmar Seiffert, Mary DeSouza, Bindu Murthy

**Supplementary Table S1.** PK and PD sampling schedule for milvexian.

| <b>Study day</b> | <b>Time<br/>(relative to<br/>milvexian dose);<br/>hour:min</b> | <b>PK blood sample<br/>for plasma</b> | <b>PD blood sample</b> |
|------------------|----------------------------------------------------------------|---------------------------------------|------------------------|
| 1                | 00:00                                                          | X                                     | X                      |
| 1                | 00:30                                                          | X                                     | X                      |
| 1                | 1:00                                                           | X                                     |                        |
| 1                | 2:00                                                           | X                                     | X                      |
| 1                | 3:00                                                           | X                                     | X                      |
| 1                | 4:00                                                           | X                                     | X                      |
| 1                | 6:00                                                           | X                                     |                        |
| 1                | 8:00                                                           | X                                     |                        |
| 1                | 10:00                                                          | X                                     |                        |
| 1                | 12:00                                                          | X                                     | X                      |
| 2                | 24:00                                                          | X                                     | X                      |
| 4                | 00:00                                                          | X                                     | X                      |
| 7                | 00:00                                                          | X                                     | X                      |
| 10               | 00:00                                                          | X                                     | X                      |
| 13               | 00:00                                                          | X                                     |                        |

|    |       |   |   |
|----|-------|---|---|
| 14 | 00:00 | X | X |
| 14 | 00:30 | X | X |
| 14 | 1:00  | X |   |
| 14 | 2:00  | X | X |
| 14 | 3:00  | X | X |
| 14 | 4:00  | X | X |
| 14 | 6:00  | X |   |
| 14 | 8:00  | X |   |
| 14 | 10:00 | X |   |
| 14 | 12:00 | X | X |
| 15 | 24:00 | X | X |
| 16 | 48:00 | X | X |
| 17 | 72:00 | X | X |

PK, pharmacokinetics; PD, pharmacodynamics.
